# Supplementary material for: A Review of Lipidomics of Cardiovascular Disease Highlights the Importance of Isolating Lipoproteins
Source: MDPI journal article supplement (doi:10.3390/metabo10040163), 2020-04-23
Supplement: s1 [file s1]

**Table S1.** A summary of lipidomic-associated studies with cardiovascular disease.

| Study name, number of participants, country, publication year                   | Study design                                           | Platform                                                                                           | Lipids positively associated with the outcome                                                                                                                                                                                                                                                                                                                                                                                                                                        | Lipids inversely associated with the outcome                                                                                                                                                                                                                                                                                               | Lipid biomarkers adjusted for | Other covariates adjusted for                                                                                        |
|---------------------------------------------------------------------------------|--------------------------------------------------------|----------------------------------------------------------------------------------------------------|--------------------------------------------------------------------------------------------------------------------------------------------------------------------------------------------------------------------------------------------------------------------------------------------------------------------------------------------------------------------------------------------------------------------------------------------------------------------------------------|--------------------------------------------------------------------------------------------------------------------------------------------------------------------------------------------------------------------------------------------------------------------------------------------------------------------------------------------|-------------------------------|----------------------------------------------------------------------------------------------------------------------|
| Malmö Diet and Cancer (MDC) study, <sup>17</sup> Sweden,2013,n=427              | Nested case control study                              | Top-down shotgun lipidomics 85 lipids                                                              | Without correcting for multiple testing, SM38:2 was positively associated with risk of CVD. None identified after correcting for multiple testing.                                                                                                                                                                                                                                                                                                                                   | Without correcting for multiple testing, LPC16:0, LPC20:4, TAG48:1, TAG48:2, TAG48:3, TAG50:3 and TAG50:4, were inversely associated with risk of CVD. None identified after correcting for multiple testing.                                                                                                                              | HDL-c and LDL-c               | Sex, age, BMI, type 2 diabetes, anti-hypertension treatment, smoking, and SBP                                        |
| Bruneck Study, <sup>18</sup> Italy,2014, n=1400                                 | Cohort study                                           | Top-down shotgun lipidomics 135 lipids                                                             | Lipid species with the strongest positive association with risk of CVD were TAGs and CEs with a low carbon number and double-bond content. 28 lipids were identified, namely, TAG(50:1), TAG(50:2), TAG(50:3), TAG(52:2), TAG(52:3), TAG(52:5), TAG(54:2), TAG(56:1), TAG(56:5), TAG(56:6), PE(34:1), PE(34:2), PE(36:2), PE(36:4), PE(36:5), PE(38:3), PE(38:4), PE(38:5), PE(O-38:5), SM(34:2), SM(42:2), PC(32:1), PC(38:2), PC(38:3), CE(14:0), CE(16:0), CE(16:1), CE(22:2)     | None.                                                                                                                                                                                                                                                                                                                                      | Statin medication             | Age and sex                                                                                                          |
| TwinGene, ULSAM, and PIVUS, <sup>25</sup> Sweden,2014,n=3668                    | Nested case control study                              | LC-MS 21 lipids                                                                                    | MAG 18:2 was positively associated with risk of CVD.                                                                                                                                                                                                                                                                                                                                                                                                                                 | LPC 18:1, LPC 18:2, and SM 28:1 were inversely associated with risk of CVD.                                                                                                                                                                                                                                                                | LDL-c, HDL-c, TAG             | Sex, systolic blood pressure, body mass index, current smoker, antihypertensive treatment, and diabetes at baseline. |
| LURIC study, <sup>21</sup> Germany, 2014,n=3316                                 | Cohort study<br>The majority had a history of CHD.     | LC-MS 178 lipids                                                                                   | Without correcting for multiple testing, 30 lipids were positively associated with risks of recurrent CHD and mortality, including PC(32:0), PC(38:0), PC(30:1), PC(34:1), PC(36:1), PC(O-32:0), PC(O-34:0), PC(O-32:1), PC(O-34:1), PC(O-38:5), PE(30:1), PE(32:1), PE(34:1), PE(36:1), PE(40:1), PE(34:2), PE(36:2), PE(38:2), PE(34:3), PE(36:3), PE(36:4), PE(O-32:0), PE(O-36:2), SM(16:0), SM(16:1), SM(24:1), SM(24:2), Cer(d18:1/16:0), Cer(d18:1/18:0), and Cer(d18:1/24:1) | Without correcting for multiple testing, 18 lipids were inversely associated with risks of recurrent CHD and mortality, including PC(32:2), PC(36:4), PC(36:5), PC(40:6), PC(40:7), PC(38:7), PC(38:6), PC(38:5), PC(38:4), PC(38:3), LPC(16:0), LPC(18:0), PE(36:6), PE(O-38:7), SM(23:0), SM(24:0), Cer(d18:1/23:0), and Cer(d18:1/24:0) | HDL-c and LDL-c               | Age, gender, smoking, diabetes and hypertension.                                                                     |
| ATHEROREMO-IVUS, <sup>26</sup><br><sup>27</sup> Netherlands,2015 and 2018,n=581 | Cohort study<br>All participants had a history of CHD. | LC-MS Lipids identified in LURIC study, including CE 14:0, CE 18:3, CE 20:4, CE 20:5, and CE 22:5, | Cer (d18:1/16:0) and Cer(d18:1/24:1)/Cer(d18:1/24:0) ratio were positively associated with major adverse cardiac events including recurrent CHD and all-cause mortality.                                                                                                                                                                                                                                                                                                             | None.                                                                                                                                                                                                                                                                                                                                      | Statin use, LDL-c             | Gender, age, hypertension, hypercholesterolemia, and diabetes.                                                       |

|                                                                                                               |                                                                      |                                                                                                                                                          |                                                                                                                                                                                                                                                                                                                                                                                                                                                                                                                                                                                                                                                                                                                                                                                                                |                                                                                                                                                                                                                                                                                                         |                                                   |                                                                                                                                                                                                                                                                                                                                        |
|---------------------------------------------------------------------------------------------------------------|----------------------------------------------------------------------|----------------------------------------------------------------------------------------------------------------------------------------------------------|----------------------------------------------------------------------------------------------------------------------------------------------------------------------------------------------------------------------------------------------------------------------------------------------------------------------------------------------------------------------------------------------------------------------------------------------------------------------------------------------------------------------------------------------------------------------------------------------------------------------------------------------------------------------------------------------------------------------------------------------------------------------------------------------------------------|---------------------------------------------------------------------------------------------------------------------------------------------------------------------------------------------------------------------------------------------------------------------------------------------------------|---------------------------------------------------|----------------------------------------------------------------------------------------------------------------------------------------------------------------------------------------------------------------------------------------------------------------------------------------------------------------------------------------|
|                                                                                                               |                                                                      | Cer(d18:1/16:0),<br>Cer(d18:1/20:0),<br>Cer(d18:1/24:0),<br>Cer(d18:1/24:1),and<br>lactosylceramide<br>(LacCer, d18:1/18:0).                             |                                                                                                                                                                                                                                                                                                                                                                                                                                                                                                                                                                                                                                                                                                                                                                                                                |                                                                                                                                                                                                                                                                                                         |                                                   |                                                                                                                                                                                                                                                                                                                                        |
| FINRISK, SABRE,<br>and<br>BWHHS, <sup>19</sup> Finland<br>and<br>U.K.,2015,n=13441                            | Cohort study                                                         | NMR Total lipid<br>within 14 lipoprotein<br>subclasses;<br>triglycerides,<br>phospholipids,<br>sphingomyelin, and<br>fatty acyl chain in<br>total plasma | Before adjusting for standard lipids, the total lipid<br>concentrations within VLDL, IDL, and LDL were<br>positively associated with risk of CVD.After further<br>adjusting for routine lipids, only MUFA was positively<br>associated with risk of CVD.                                                                                                                                                                                                                                                                                                                                                                                                                                                                                                                                                       | Before adjusting for standard lipids, total<br>lipid concentrations and cholesterols<br>within large HDL particles were<br>inversely associated with risk of<br>CVD.After further adjusting for routine<br>lipids, PUFA, omega-6 fatty acids, and<br>DHA were inversely associated with risk<br>of CVD. | Total and HDL-<br>cholesterol                     | Age, sex, blood pressure,<br>smoking, diabetes<br>mellitus, geographical<br>region, and<br>cardiovascular<br>medication.                                                                                                                                                                                                               |
| FINRISK 2002<br>Cohort, <sup>28</sup><br>Finland,2016,n=81<br>01                                              | Cohort study                                                         | LC-MS Four<br>ceramides including<br>Cer(d18:1/16:0),Cer(d<br>18:1/18:0),<br>Cer(d18:1/24:0), and<br>Cer(d18:1/24:1)                                     | Cer(d18:1/16:0), Cer(d18:1/18:0), and Cer(d18:1/24:1)<br>were positively associated with risk of CVD.                                                                                                                                                                                                                                                                                                                                                                                                                                                                                                                                                                                                                                                                                                          | None.                                                                                                                                                                                                                                                                                                   | Total and HDL-<br>cholesterol                     | Blood pressure (adjusted<br>+15 mm Hg for<br>antihypertensive<br>medication), diabetes<br>mellitus, and smoking.                                                                                                                                                                                                                       |
| Corogene<br>study,SPUM-<br>ACS, and<br>BECAC, <sup>29</sup> Northern<br>European<br>countries,2016,n=3<br>377 | Cohort<br>study.The<br>majority had a<br>history of<br>CHD.          | LC-MS Four<br>ceramides including<br>Cer(d18:1/16:0),Cer(d<br>18:1/18:0),<br>Cer(d18:1/24:0), and<br>Cer(d18:1/24:1)                                     | Cer(d18:1/16:0) and Cer(d18:1/16:0)/Cer(d18:1/24:0) ratio<br>were positively associated with higher risk of CVD<br>mortality.                                                                                                                                                                                                                                                                                                                                                                                                                                                                                                                                                                                                                                                                                  | Cer(d18:1/24:0) was inversely associated<br>with risk of CVD mortality.                                                                                                                                                                                                                                 | Total<br>cholesterol,<br>TAG, LDL-c,<br>and HDL-c | Age, gender, smoking<br>status, previous acute MI,<br>diabetes,hypertension,<br>and prior stroke.                                                                                                                                                                                                                                      |
| ADVANCE<br>trial, <sup>22</sup> Australia,20<br>16,n=3779                                                     | Case-cohort<br>study.All<br>participants<br>had a history<br>of CVD. | LC-MS 310 lipids                                                                                                                                         | 17 ceramides, 1 SM, 7 PCs, 8 LPCs, and 3 CEs were<br>positively associated with risks of recurrent CVD<br>incidence and CVD mortality, namely, Cer(d18:1/24:1),<br>HexCer (d18:1/16:0), HexCer (d18:1/18:0), HexCer<br>(d18:1/20:0), HexCer (d18:1/22:0), HexCer (d18:1/24:0),<br>HexCer (d18:1/24:1), Hex2Cer (d18:1/16:0), Hex2Cer<br>(d18:1/18:0), Hex2Cer (d18:1/20:0), Hex2Cer (d18:1/22:0),<br>Hex2Cer (d18:1/24:0), Hex2Cer (d18:1/24:1), Hex3Cer<br>(d18:1/20:0), Hex3Cer (d18:1/22:0), Hex3Cer (d18:1/24:0),<br>Hex3Cer (d18:1/24:1), SM (34:1), PC(O-32:0), PC(O-32:1),<br>PC(O-34:1), PC(O-36:1), PC(O-36:2), PC(P-32:1), PC(P-<br>34:1), LPC (20:1), LPC (O-18:0), LPC (O-18:1), LPC (O-<br>22:0), LPC (O-22:1), LPC (O-24:0), LPC (O-24:1), LPC (O-<br>24:2), CE (16:0), CE (20:1), and CE (24:1) | 5 PCs and 1 TAG were inversely<br>associated with risks of recurrent CVD<br>incidence and CVD mortality, namely,<br>PC (34:5), PC(35:4), PC (40:6), PC (P-<br>36:5), PC (P-38:6),TAG (56:6)                                                                                                             | HDL-c                                             | Age, sex, body mass<br>index, systolic blood<br>pressure,<br>glycohemoglobin,<br>estimated glomerular<br>filtration rate, diabetes<br>duration, C-<br>reactiveprotein, history of<br>macrovascular disease,<br>history of heart failure,<br>use of antihypertensive<br>medication, use of<br>antiplatelet medication,<br>and exercise. |

|                                                                     |                                                                 |                                                                                                                                   |                                                                                                                                                                                                                                                                                                                                                                                                |                                                                                                                                                                                                                              |                               |                                                                                                                                                                                                                                |
|---------------------------------------------------------------------|-----------------------------------------------------------------|-----------------------------------------------------------------------------------------------------------------------------------|------------------------------------------------------------------------------------------------------------------------------------------------------------------------------------------------------------------------------------------------------------------------------------------------------------------------------------------------------------------------------------------------|------------------------------------------------------------------------------------------------------------------------------------------------------------------------------------------------------------------------------|-------------------------------|--------------------------------------------------------------------------------------------------------------------------------------------------------------------------------------------------------------------------------|
| PREDIMED Trial, <sup>3</sup><br>0-32 Spain, 2017 and<br>2018, n=980 | Case-cohort<br>study                                            | LC-MS202 lipids                                                                                                                   | Cer (d18:1/16:0), Cer (d18:1/22:0), Cer (d18:1/24:0), and<br>Cer (d18:1/24:1) were positively associated with risk of<br>CVD. Lipid cluster that included DAG and MAG with<br>stearic acyl chain was positively associated with risk of<br>CVD.                                                                                                                                                | Lipid cluster that included highly<br>unsaturated PCs and CEs was inversely<br>associated with risk of CVD.                                                                                                                  | History of<br>dyslipidemia    | Age, sex, body mass<br>index, family history of<br>premature CHD, smoking<br>status, histories of<br>hypertension, and type 2<br>diabetes mellitus.                                                                            |
| Women's Health<br>Initiative, <sup>23</sup> U.S., 20<br>17, n=1571  | Nested case<br>control study                                    | LC-MS217 lipids                                                                                                                   | After adjusting for standard lipids, 5 lipids including<br>C34:2 hydroxy-PC, C36:4 hydroxy-PC, 5-<br>hydroxyeicosatetraenoic acid (HETE), 15-HETE, and 11-<br>HETE were positively associated with risk of CVD. TAG<br>and DAG were positively associated with risk of CVD,<br>however, the association was eliminated after adjusting<br>for standard lipids.                                 | None.                                                                                                                                                                                                                        | Total and<br>HDL cholesterol  | Baseline age,<br>race/ethnicity,<br>hysterectomy status,<br>enrollment window,<br>aspirin use, statin<br>use, antihyperglycemic<br>use, antihypertensive use,<br>smoking, systolic blood<br>pressure, and diabetes<br>mellitus |
| China Kadoorie<br>Biobank, <sup>20</sup> Chinese<br>, 2018, n=4662  | Nested case<br>control study                                    | NMR Total lipid,<br>triglycerides, and<br>cholesterol within 14<br>lipoprotein<br>subclasses; fatty acyl<br>chain in total plasma | Total lipid concentrations of VLDL, IDL, LDL were<br>positively associated with risk of CVD. Triglycerides<br>within all lipoproteins, including most HDL particles,<br>were positively associated with risk of CVD.                                                                                                                                                                           | Total lipid concentration and cholesterol<br>in HDL were inversely associated with<br>risk of CVD.                                                                                                                           | None                          | Age, sex, fasting hours,<br>region, smoking status,<br>and<br>educational attainment.                                                                                                                                          |
| LIPID<br>study, <sup>24</sup> Australia,<br>2018, n=5991            | Cohort<br>study All<br>participants<br>had a history<br>of CHD. | LC-MS342 lipids                                                                                                                   | 17 lipids were positively associated with risk of<br>recurrent CVD, namely, LPC(O-24:1), LPC(O-24:2),<br>LPC(O-18:0), LPC(O-18:1), PC(O-36:1), PC(O-34:1),<br>PC(O-32:0), Hex3Cer(d18:1/22:0), Hex3Cer(d18:1/24:0),<br>Hex3Cer(d18:1/24:1) Hex2Cer(d18:1/24:1),<br>HexCer(d18:1/24:1) Hex2Cer(d18:1/16:0),<br>Hex2Cer(d18:1/18:0) HexCer(d18:1/16:0),<br>HexCer(d18:1/18:0) HexCer(d18:1/20:0) | 13 lipids were inversely associated with<br>risk of recurrent CVD, namely, PC(P-<br>38:6), PC(P-36:5), PC(40:8), PC(40:5),<br>PC(40:6), PC(38:4), PC(38:5),<br>PC(38:6), PC(38:7), PC(37:6), PC(35:4),<br>PC(34:4), PC(34:5) | Total and HDL-<br>cholesterol | Age, sex, current<br>smoking, nature of prior<br>acute coronary syndrome,<br>revascularization,<br>diabetes history, stroke<br>history, history of<br>hypertension, and<br>randomized treatment<br>allocation.                 |

ULSAM: Uppsala Longitudinal Study of Adult Men; PIVUS: Prospective Investigation of the Vasculature in Uppsala Seniors; LURIC: Ludwigshafen Risk and Cardiovascular Health; SABRE: Southall And Brent Revisited Study; BWHHS: The British Women's Heart & Health Study; SPUM-ACS: Inflammation and Acute Coronary Syndromes Study; BECAC: Bergen Coronary Angiography Cohort; ADVANCE trial: the Action in Diabetes and Vascular Disease: Preterax and Diamicon MR Controlled Evaluation (ADVANCE) trial; PREDIMED trial: The Prevención con Dieta Mediterránea (PREDIMED) trial; NMR: Nuclear magnetic resonance; LC-MS: Liquid chromatography-mass spectrometry; PC: Phosphatidylcholine; LPC: Lysophosphatidylcholine; SM: Sphingomyelin; TAG: Triglycerides; DAG: Diglycerides; MAG: Monoglycerides; PE: Phosphatidylethanolamine; CE: Cholesterol esters; VLDL: Very low-density lipoprotein; IDL: Intermediate-density lipoprotein; LDL: Low-density lipoprotein; HDL: High-density lipoprotein; HexCer: Hexoceramide; Hex2Cer: Dihexoceramide; Hex3Cer: Trihexoceramide.
